# Supplementary material for: Polyaromatic Hydrocarbon (PAH)-Based Aza-POPOPs: Synthesis, Photophysical Studies, and Nitroanalyte Sensing Abilities
Source: MDPI journal article supplement (doi:10.3390/ijms241210084), 2023-06-13
Supplement: s1 [file s1]

# **Polyaromatic hydrocarbon (PAH) aza analogues of POPOP: synthesis and photophysical properties**

Mohammed S. Mohammed,<sup>1</sup> Igor S. Kovalev,<sup>1</sup> Natalya V. Slovesnova,<sup>1,2</sup> Leila K. Sadieva,<sup>1,3</sup> Vadim A. Platonov,<sup>1</sup> Alexander S. Novikov,<sup>4,5</sup> Sougata Santra<sup>1</sup>, Julia E. Morozova<sup>6\*</sup>, Grigory V. Zyryanov,<sup>1,3</sup> Valery N. Charushin,<sup>1,3</sup> Brindaban C. Ranu<sup>1,7</sup>

<sup>1</sup> Ural Federal University, 19, Mira St., Yekaterinburg, 620002, Russian Federation

<sup>2</sup> Ural Medical University, 3, Repina St., Yekaterinburg, 620028, Russian Federation

<sup>3</sup> I. Ya. Postovsky Institute of Organic Synthesis of RAS (Ural Division), 22/20, S. Kovalevskoy/Akademicheskaya St., Yekaterinburg, 620137, Russian Federation

<sup>4</sup> Institute of Chemistry, Saint Petersburg State University, Universitetskaya Nab., 7/9, Saint Petersburg, 199034, Russian Federation

<sup>5</sup> Peoples' Friendship University of Russia (RUDN University), Miklukho-Maklaya St., 6, Moscow, 117198, Russian Federation

<sup>6</sup> Arbuzov Institute of Organic and Physical Chemistry, FRC Kazan Scientific Center of RAS, Arbuzov Str. 8, 420088 Kazan, Russian Federation

<sup>7</sup> School of Chemical Sciences, Indian Association for the Cultivation of Science, Jadavpur, Kolkata – 700 032, India

## **Contents**

|                                                                                                         |   |
|---------------------------------------------------------------------------------------------------------|---|
| Chemical structures of the tested electron deficient compounds included in composition of explosives... | 2 |
| NMR spectra.....                                                                                        | 3 |

**Chemical structures of the tested electron deficient compounds included in composition of explosives**

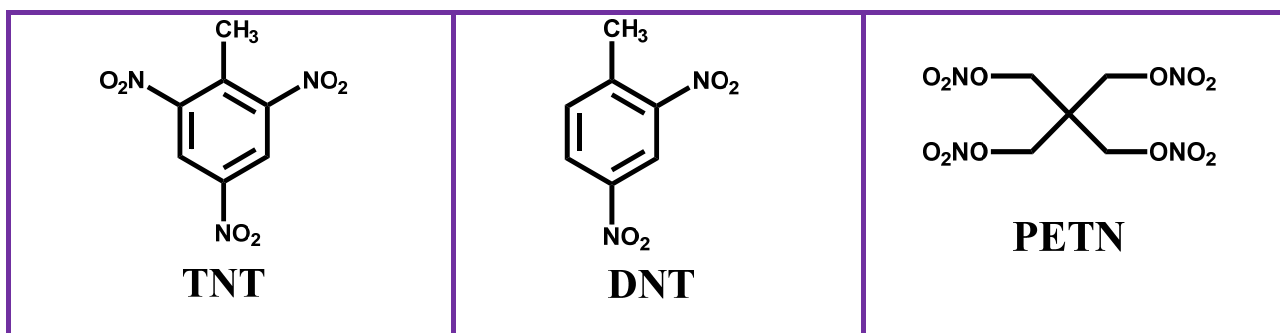

**Figure S1.** Chemical structures of 2,4,6-trinitrotoluene (TNT), 2,4-dinitrotoluene (DNT), pentaerythritol tetranitrate (PETN).

# NMR spectra

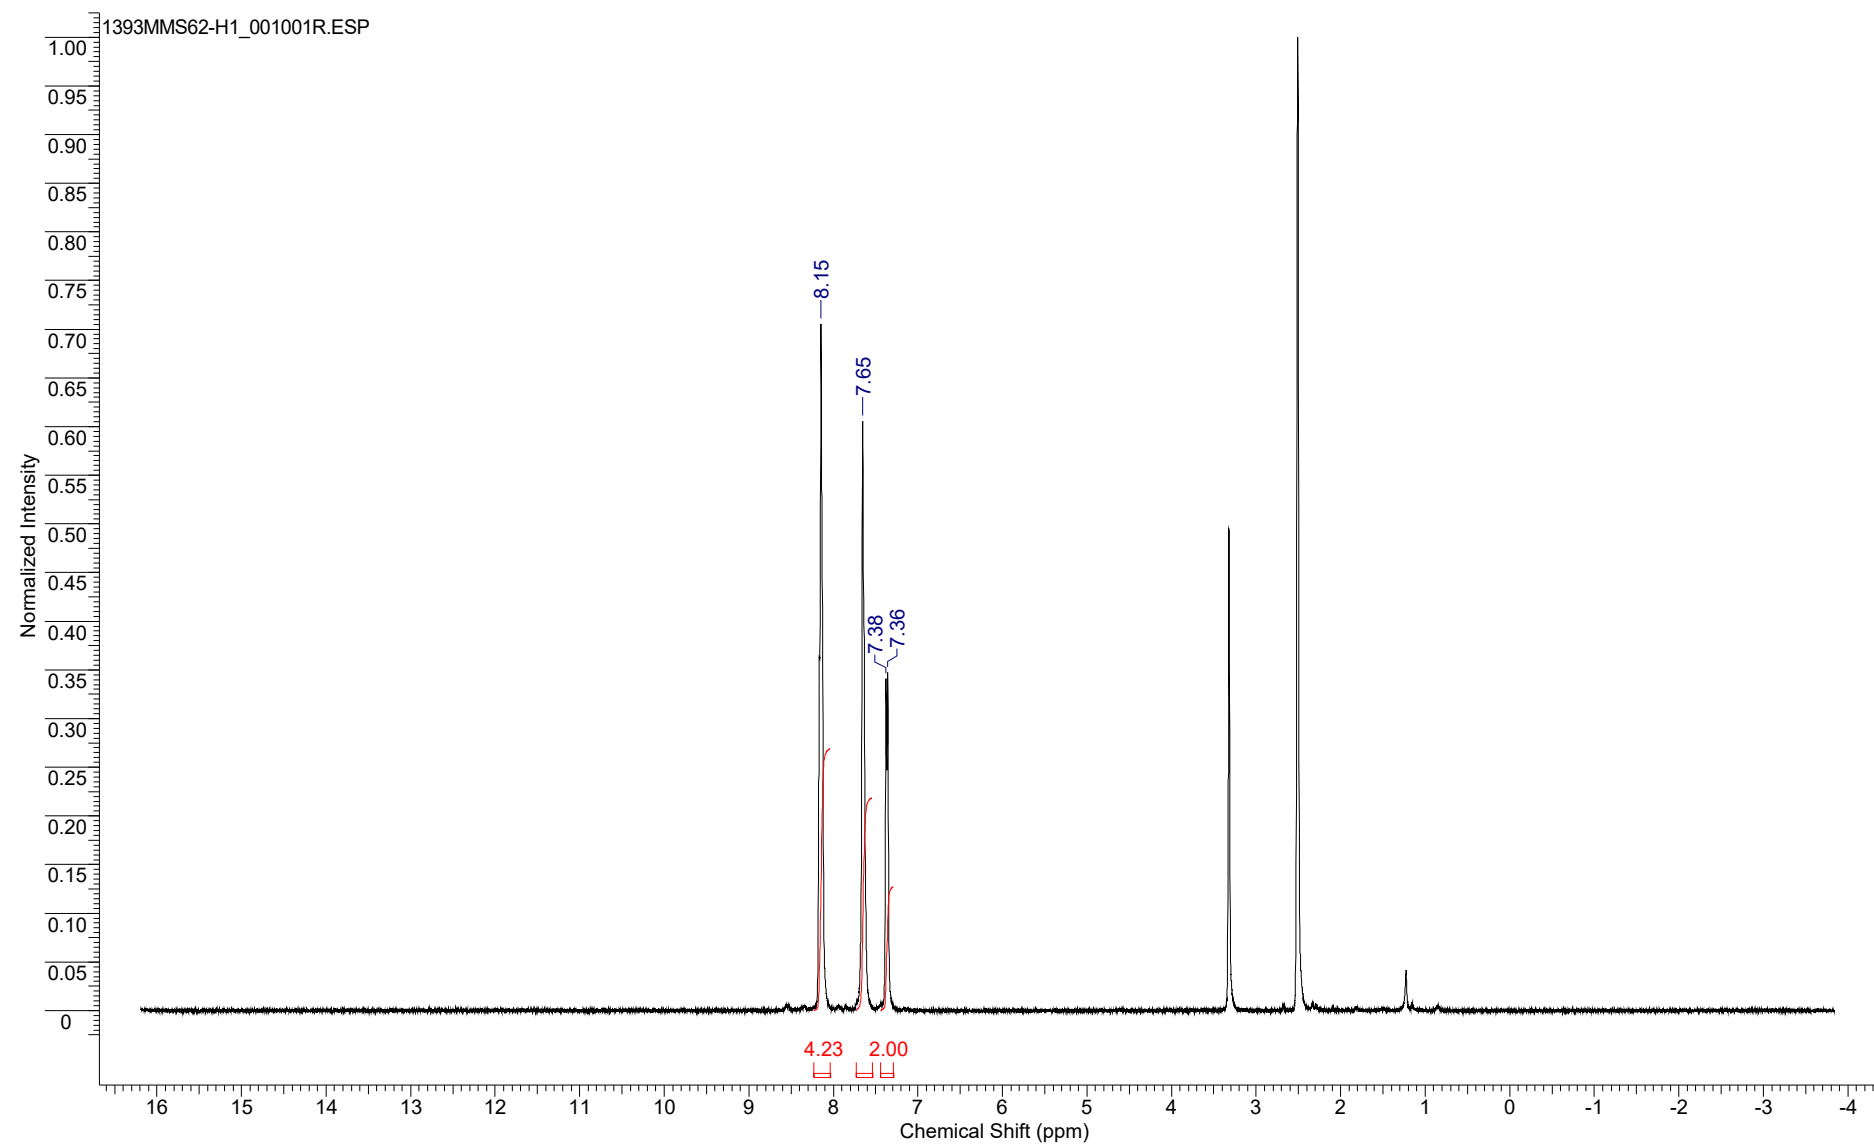

**Figure S2.**  $^1\text{H}$  NMR spectrum of compound **2a**.

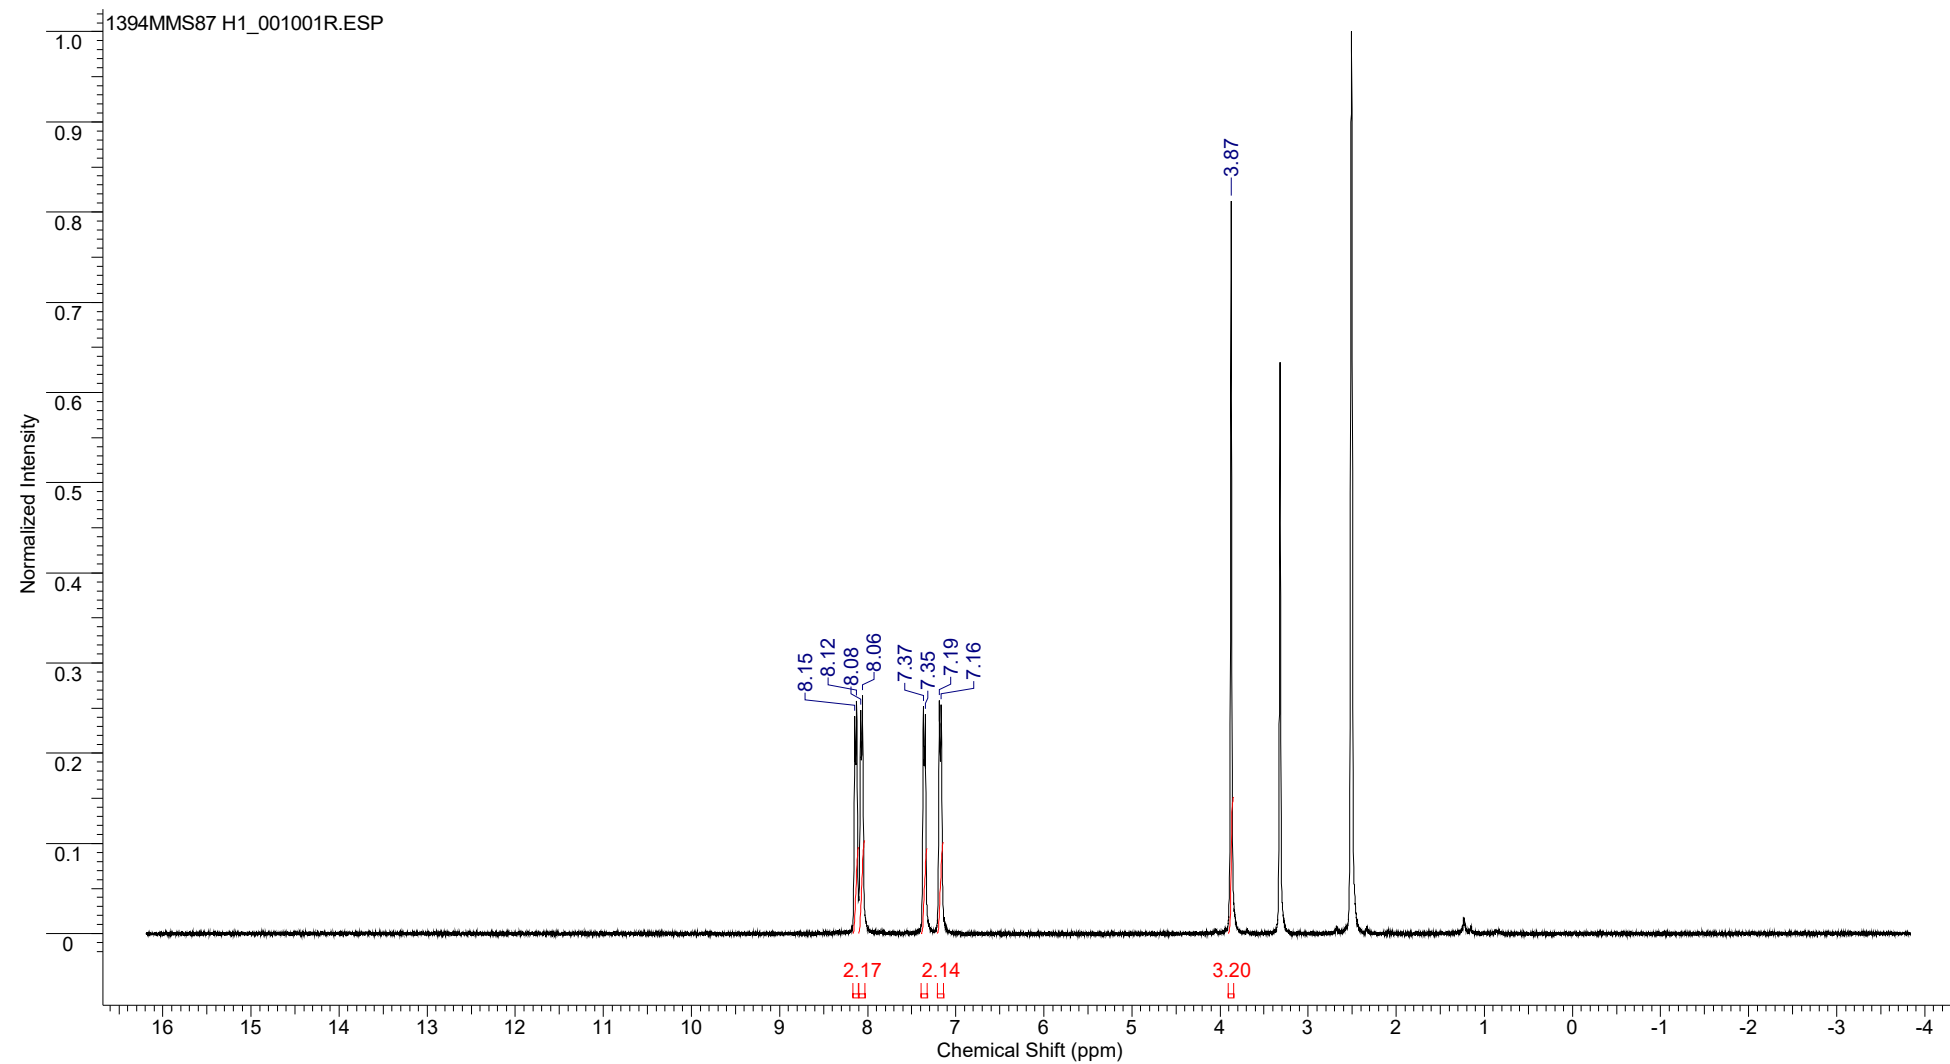

**Figure S3.**  $^1\text{H}$  NMR spectrum of compound **2b**.

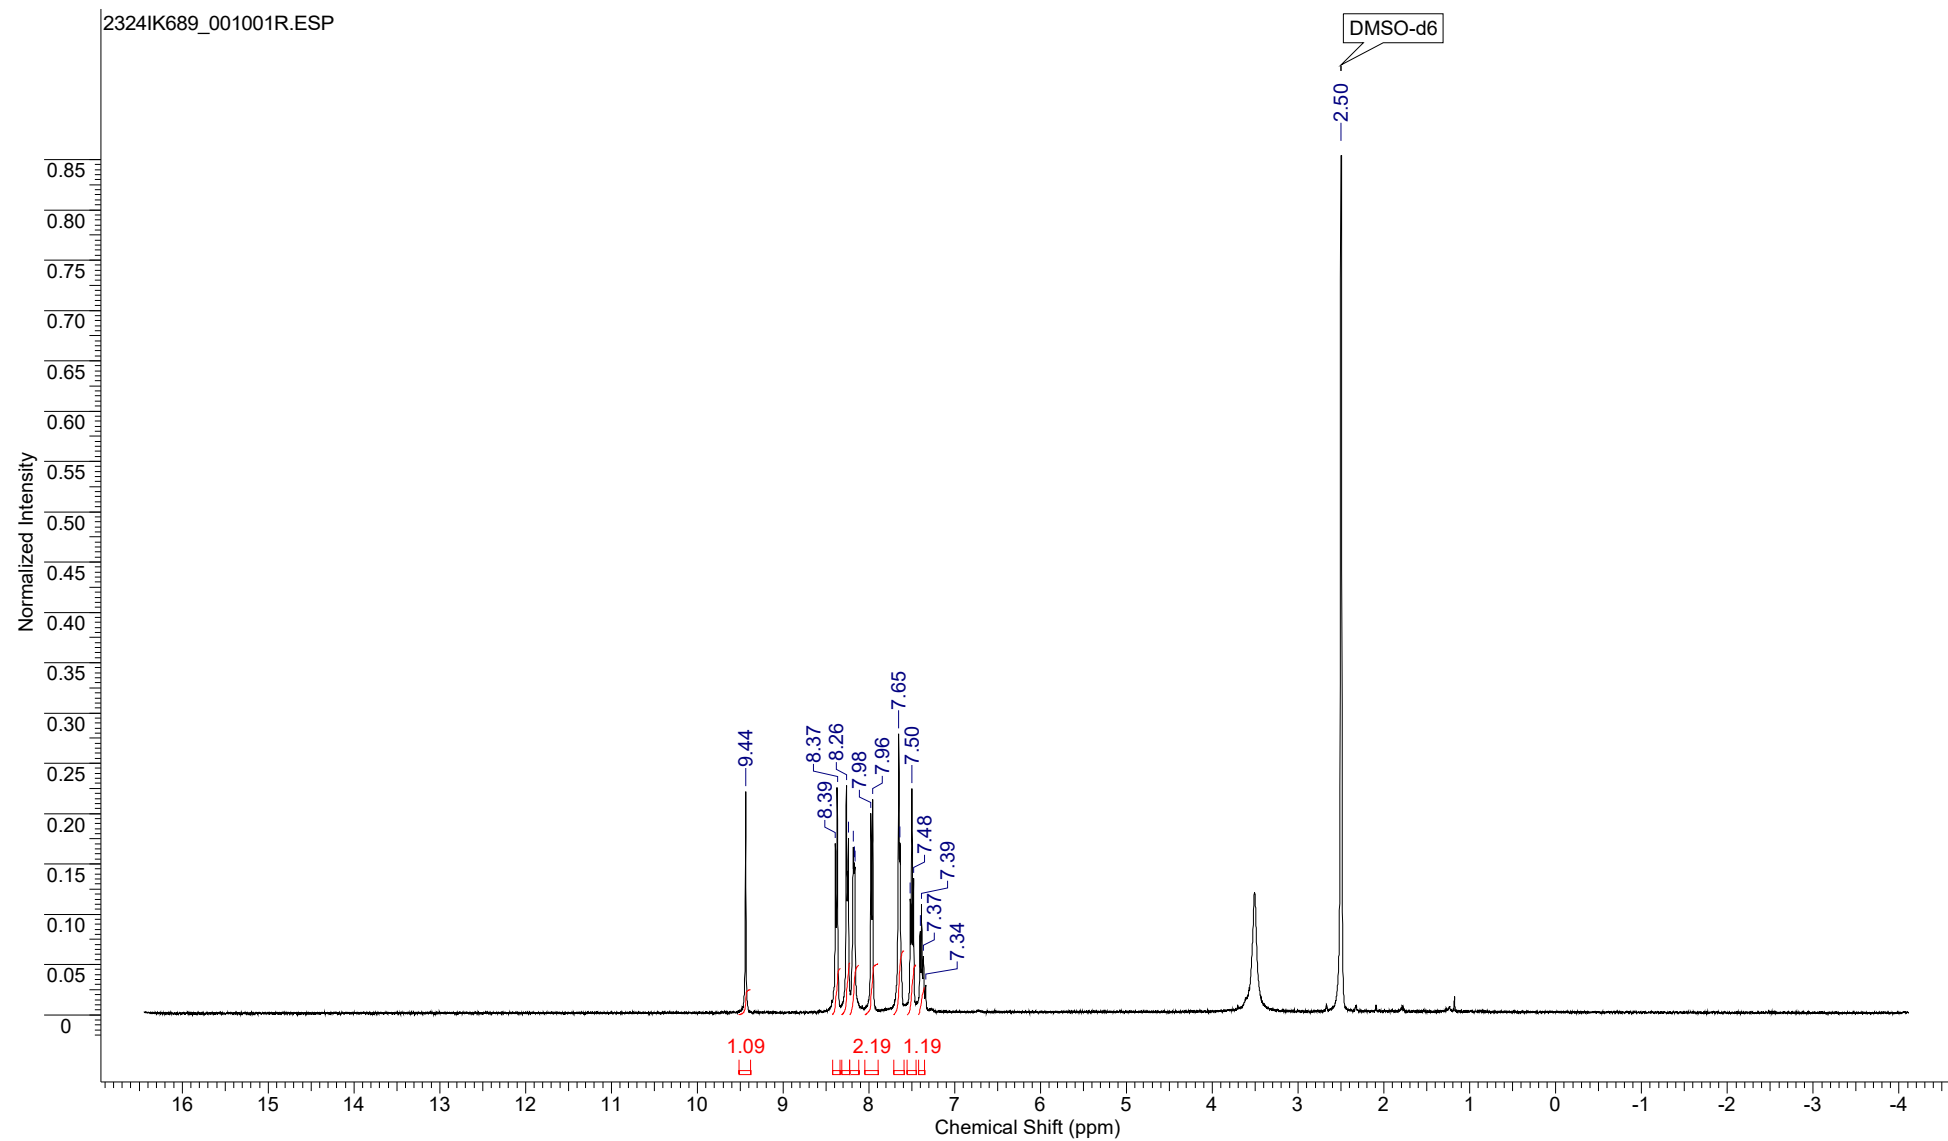

**Figure S4.**  $^1\text{H}$  NMR spectrum of compound **3a**

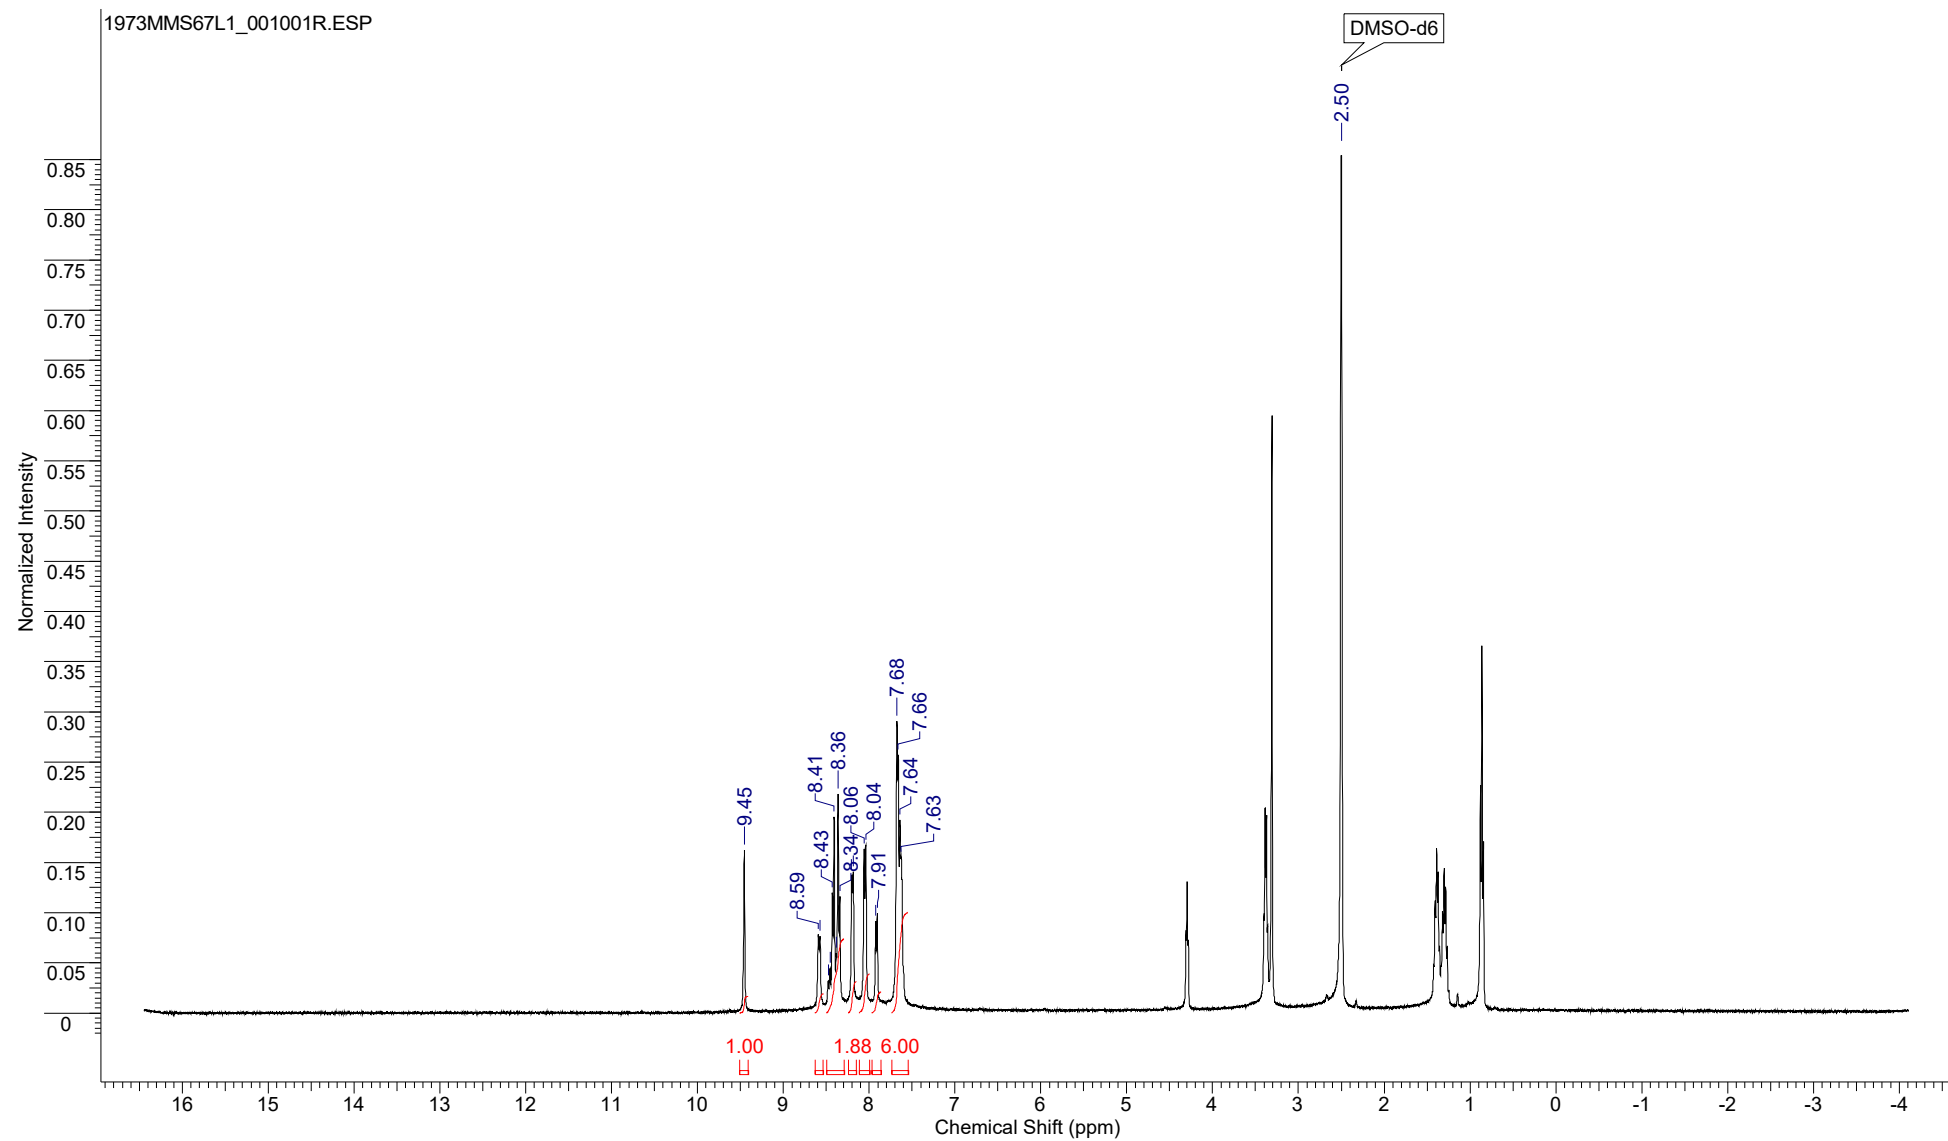

**Figure S5.**  $^1\text{H}$  NMR spectrum of compound **3b**.

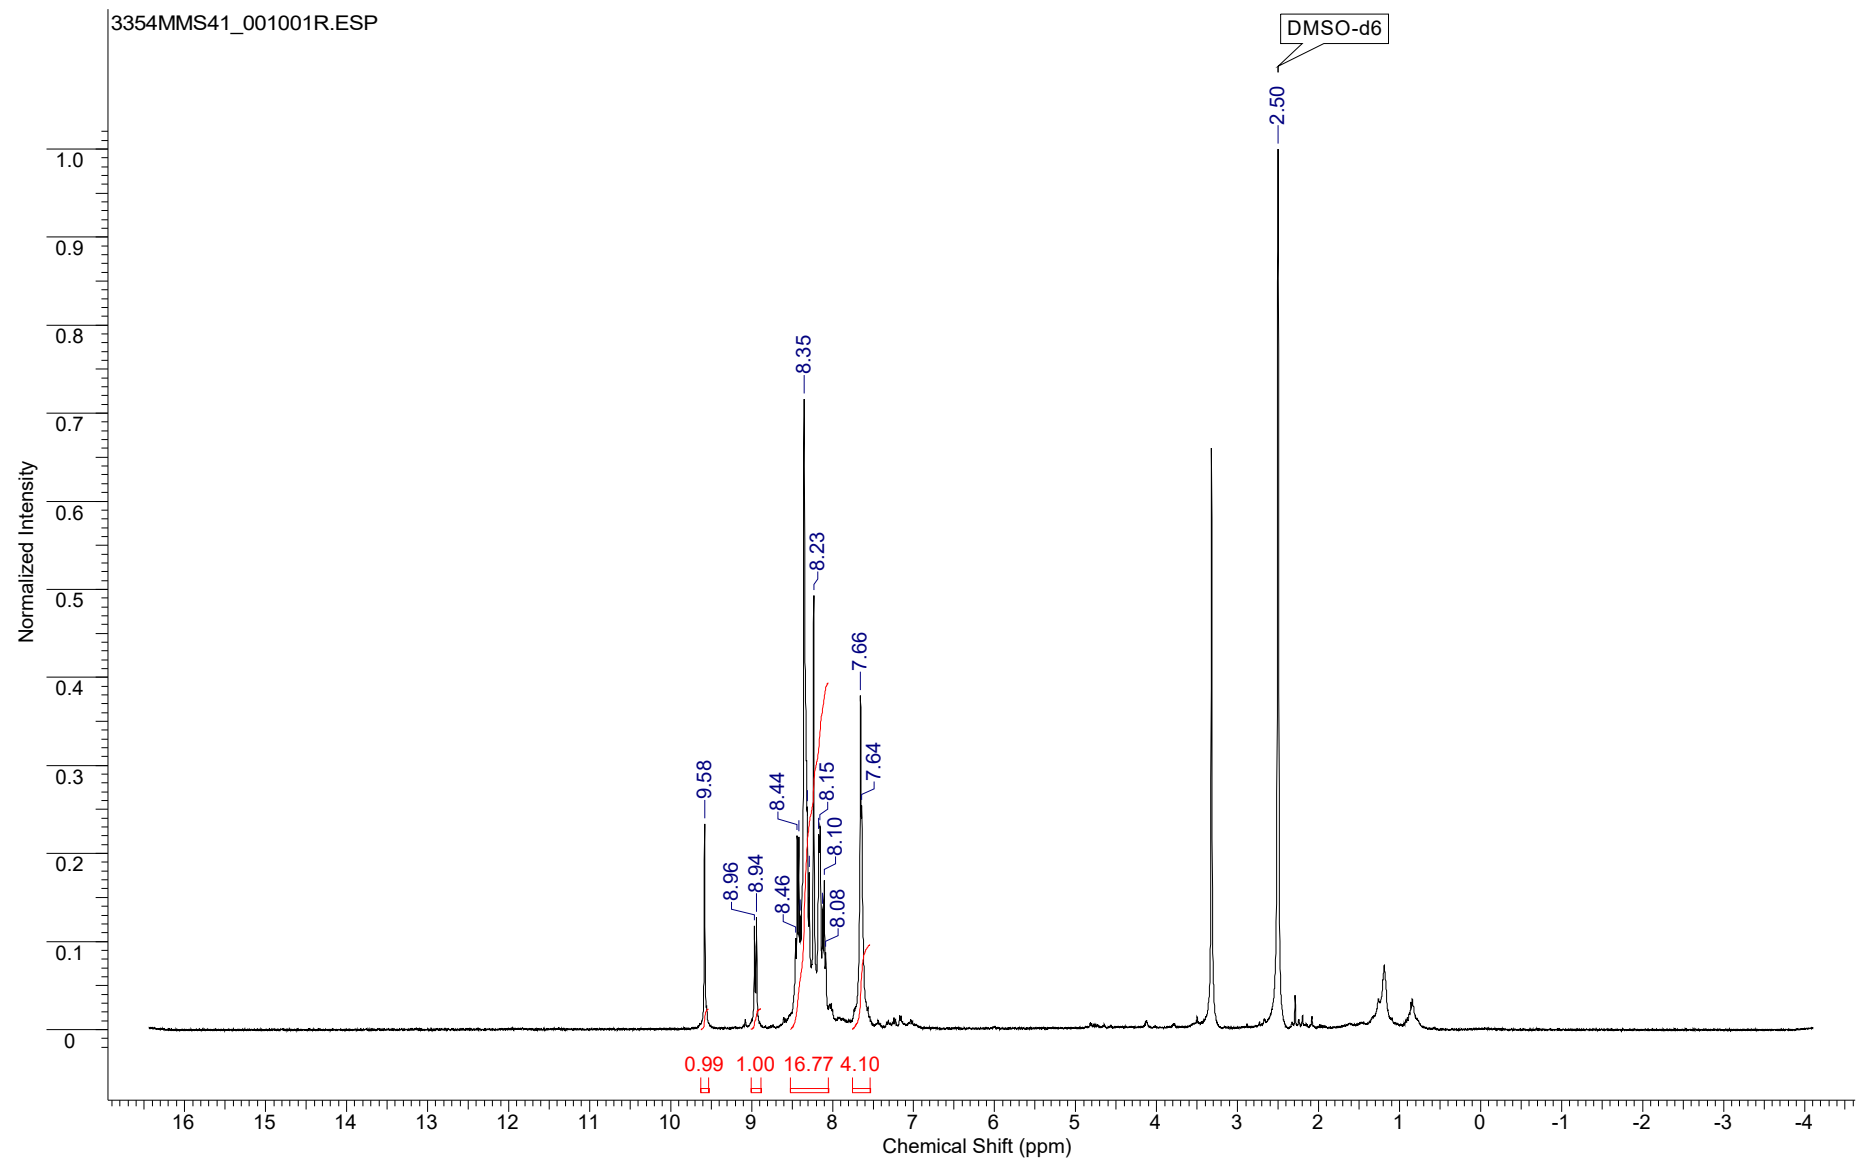

**Figure S6.**  $^1\text{H}$  NMR spectrum of compound **3c**.

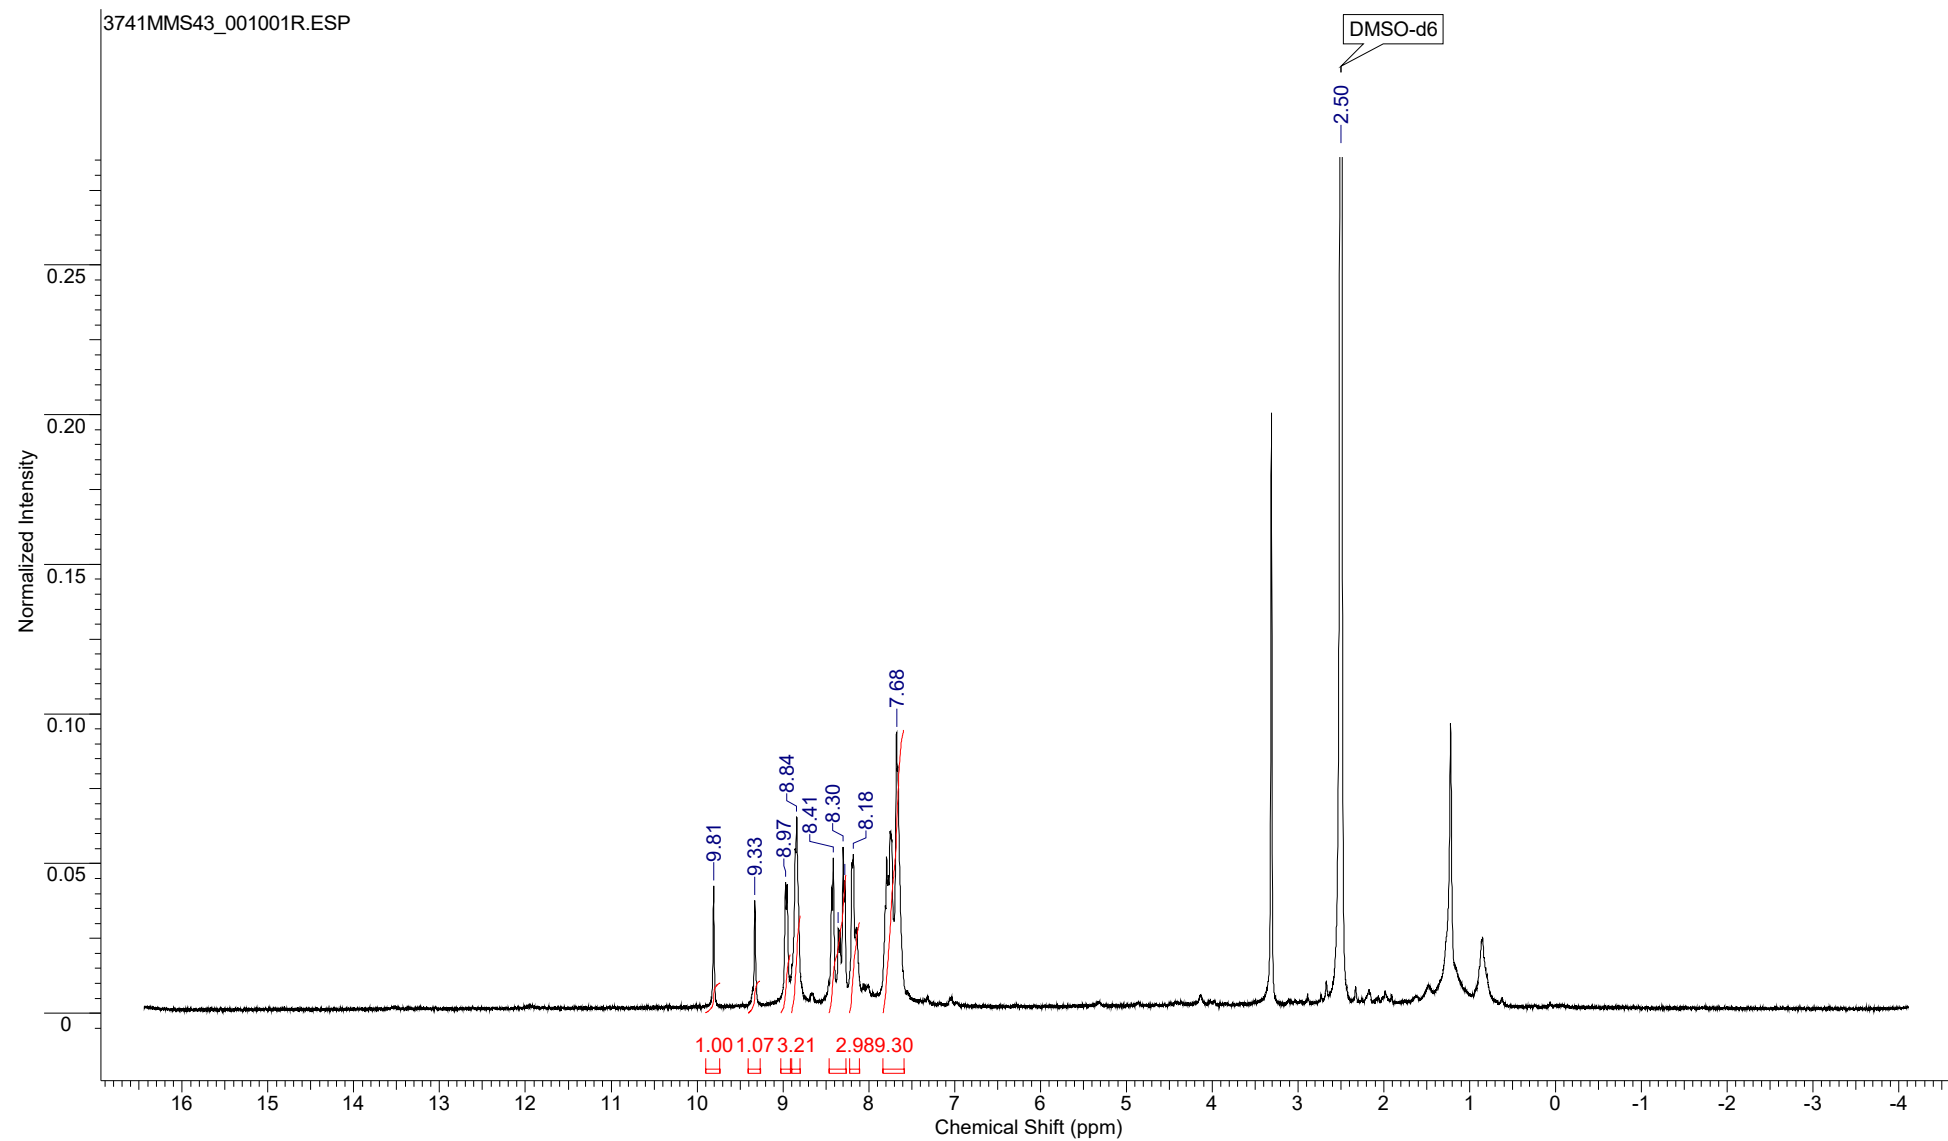

**Figure S7.**  $^1\text{H}$  NMR spectrum of compound **3d**.



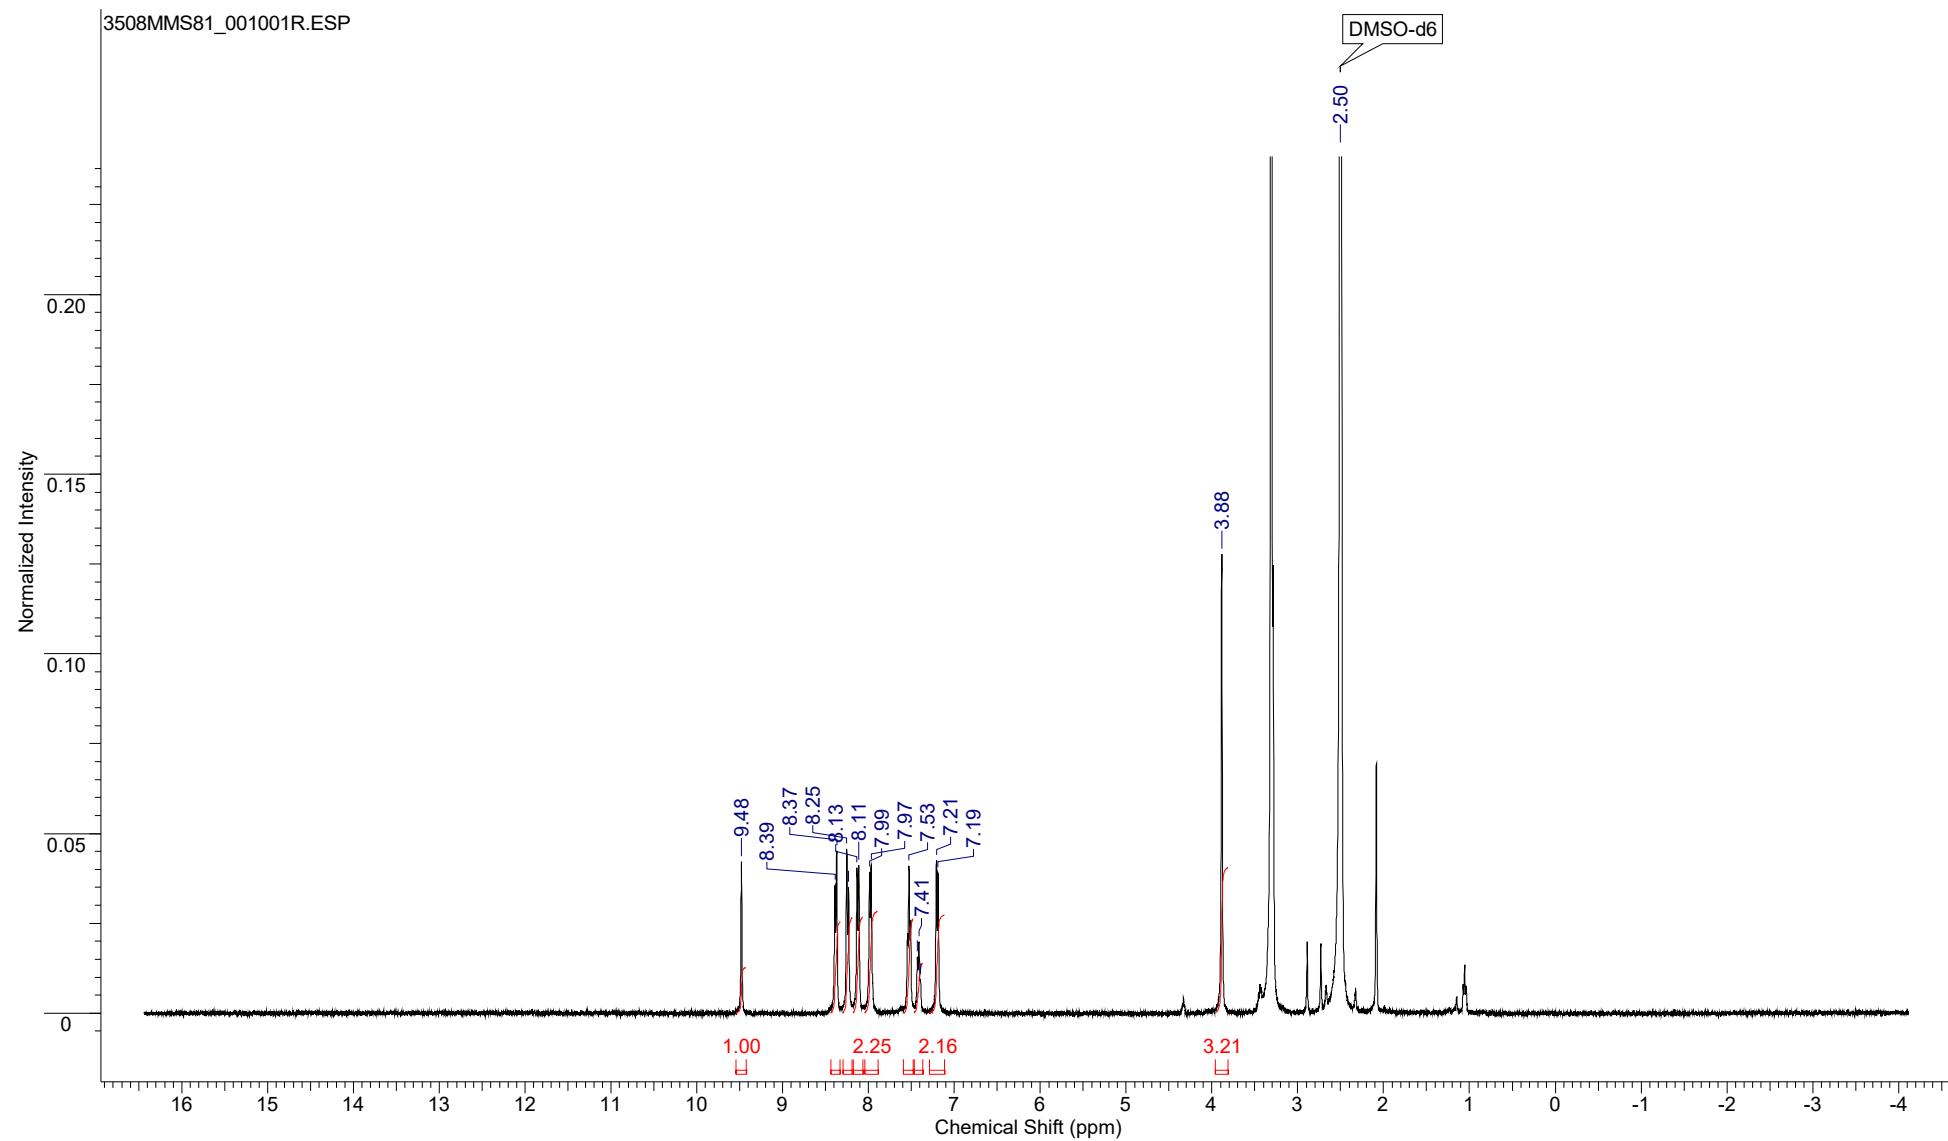

**Figure S8.**  $^1\text{H}$  NMR spectrum of compound **3e**.

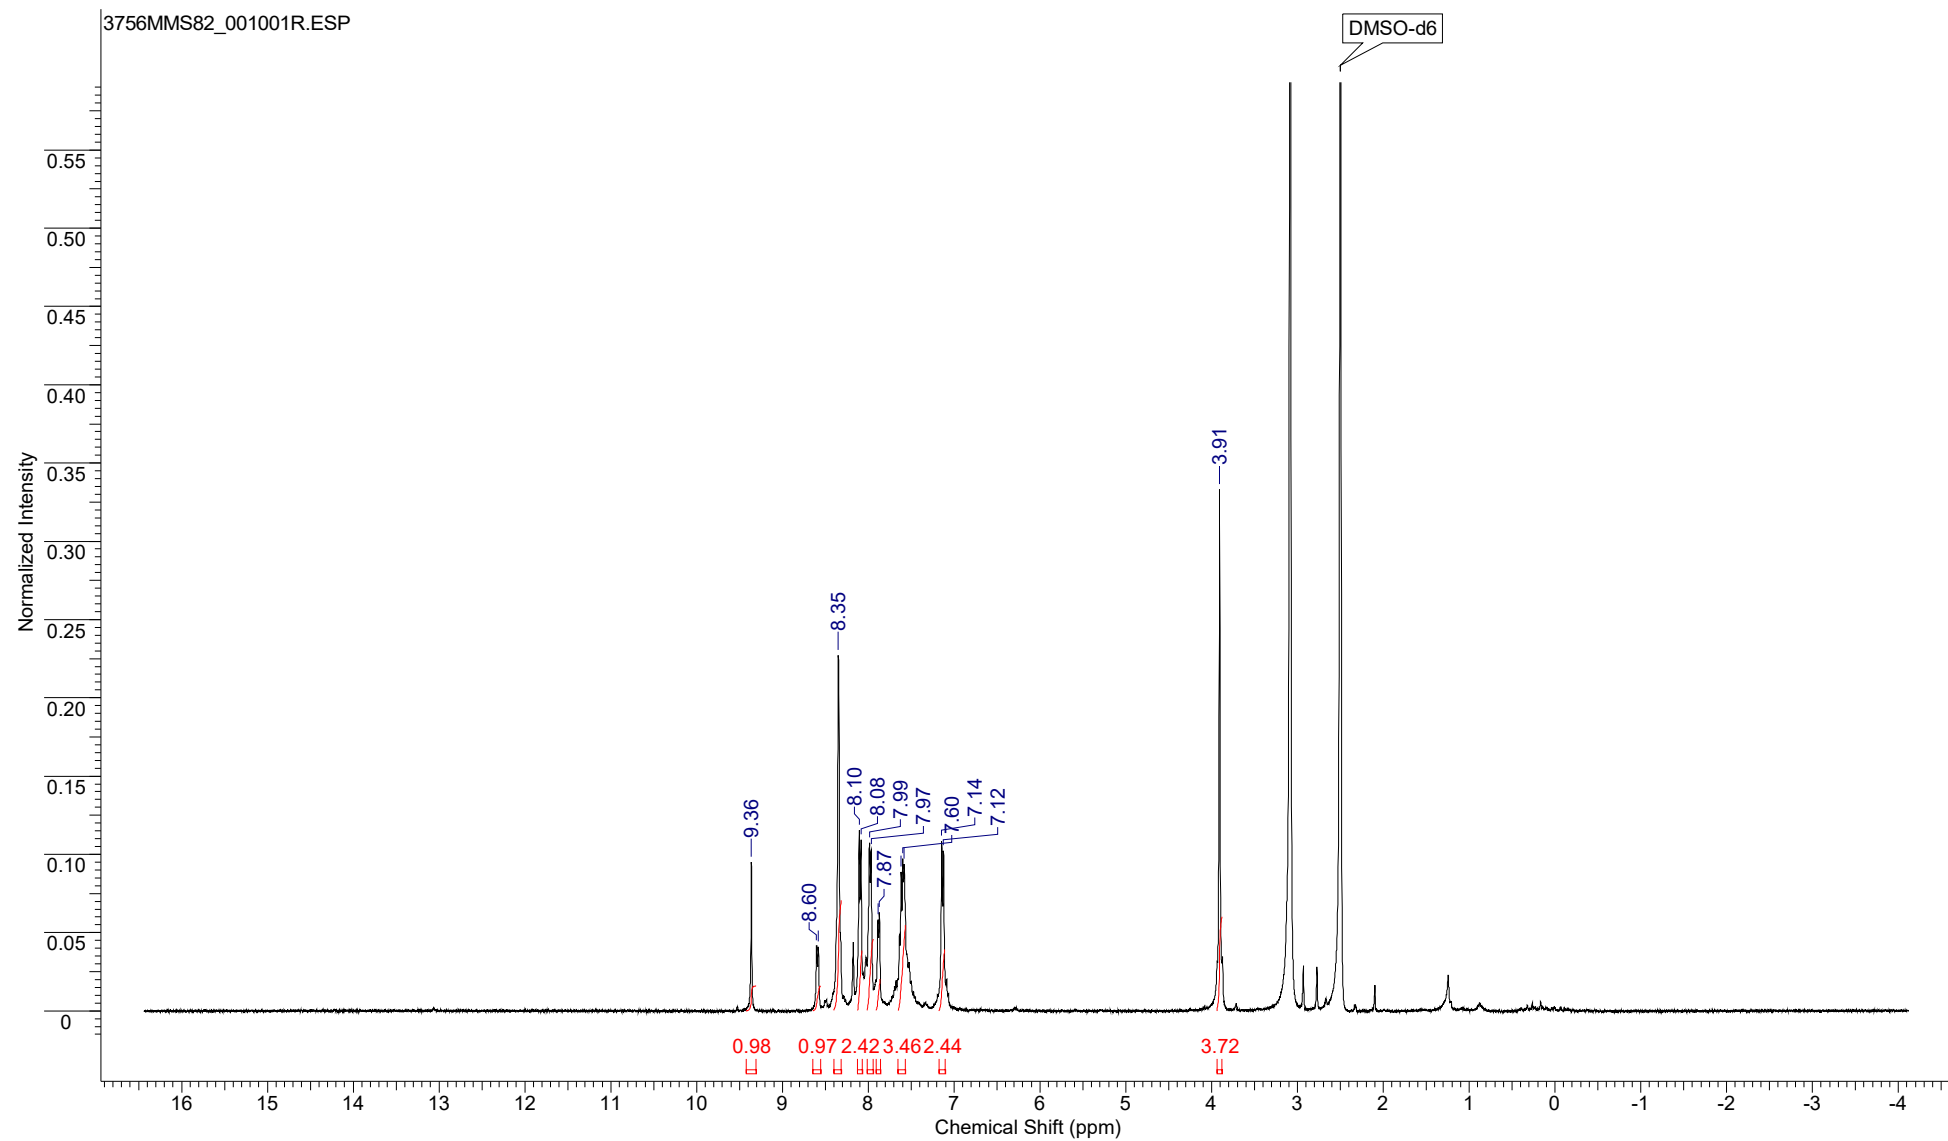

**Figure S9.**  $^1\text{H}$  NMR spectrum of compound **3f**.

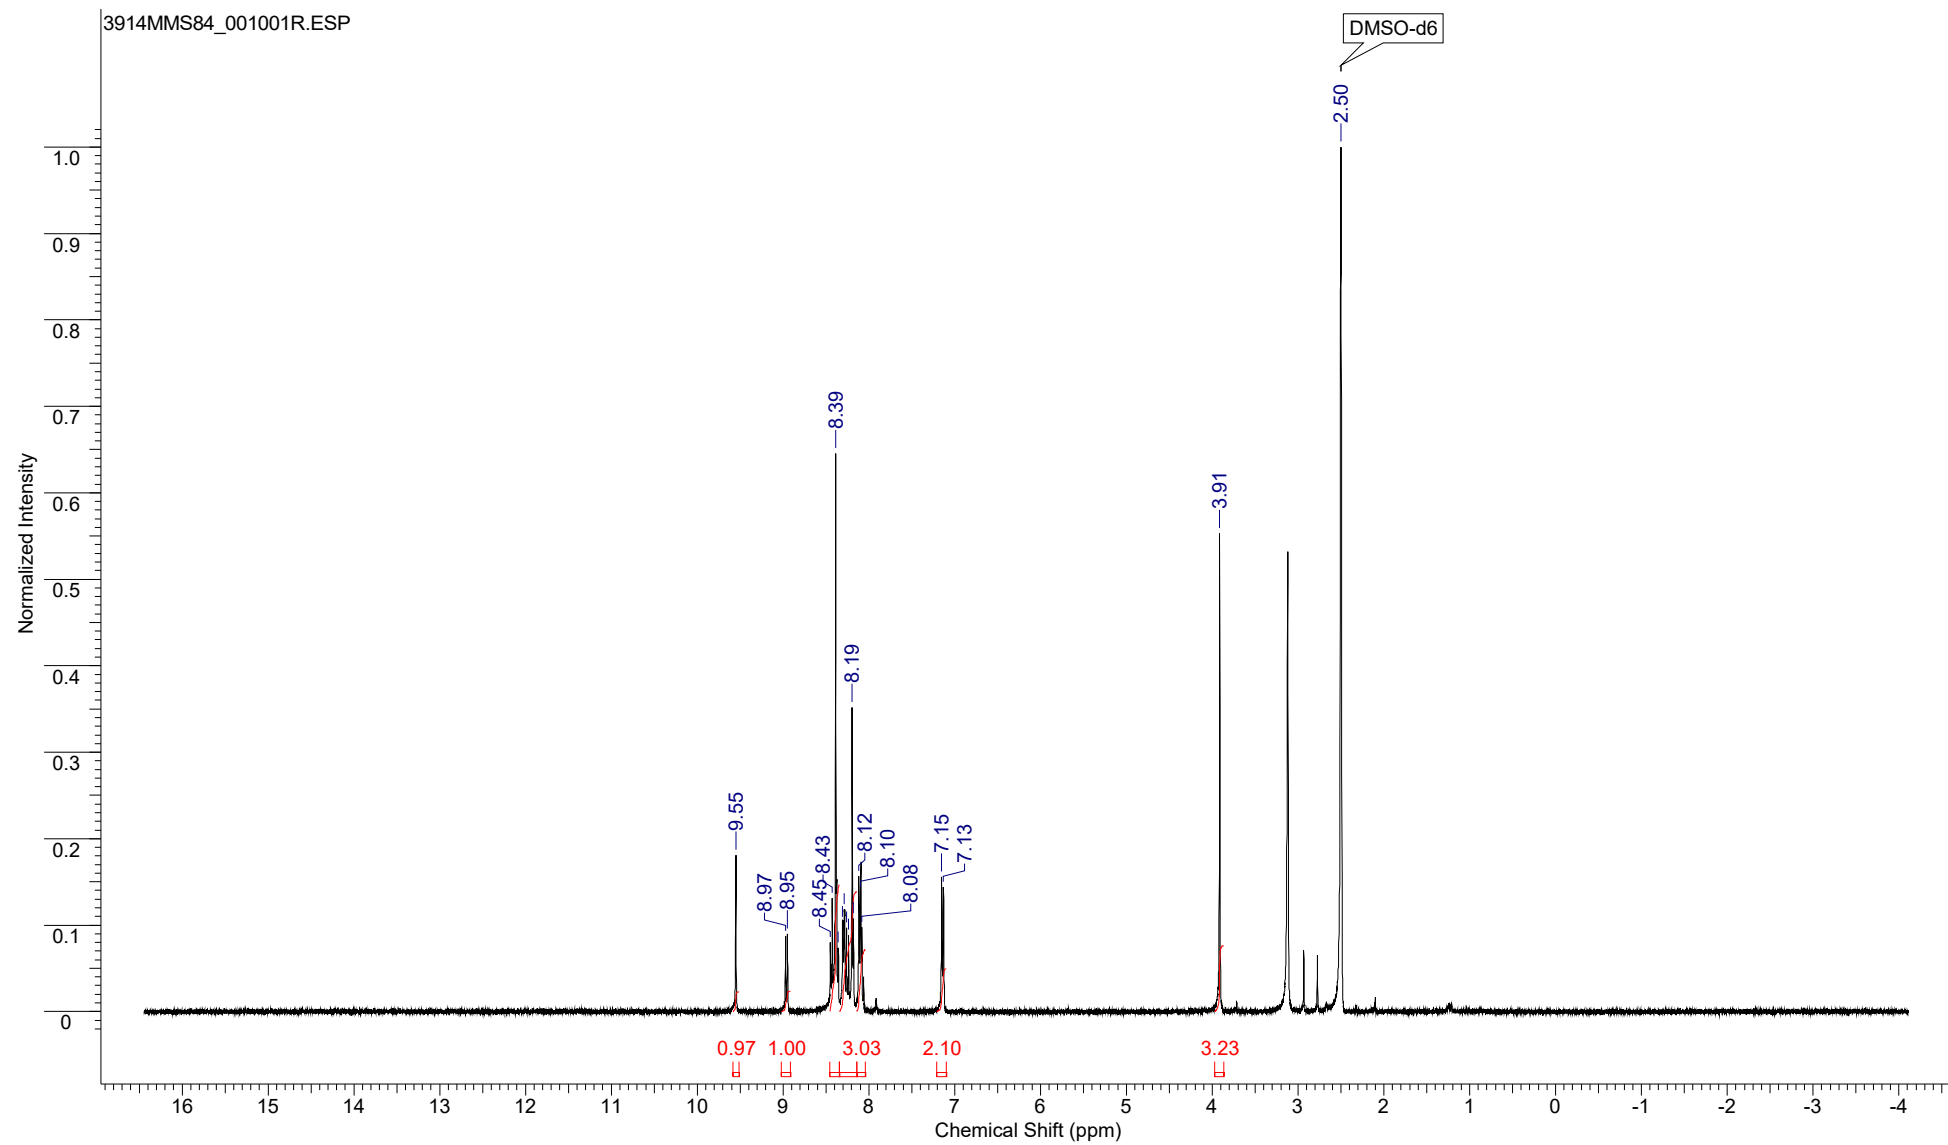

**Figure S10.**  $^1\text{H}$  NMR spectrum of compound **3g**.
